# Supplementary material
Source: PubMed Central journal article supplement (PMC8160499)
Supplement: bloodBLD2020008635-suppl1.pdf [file bloodBLD2020008635-suppl1.pdf]

## Supplemental Figure 1

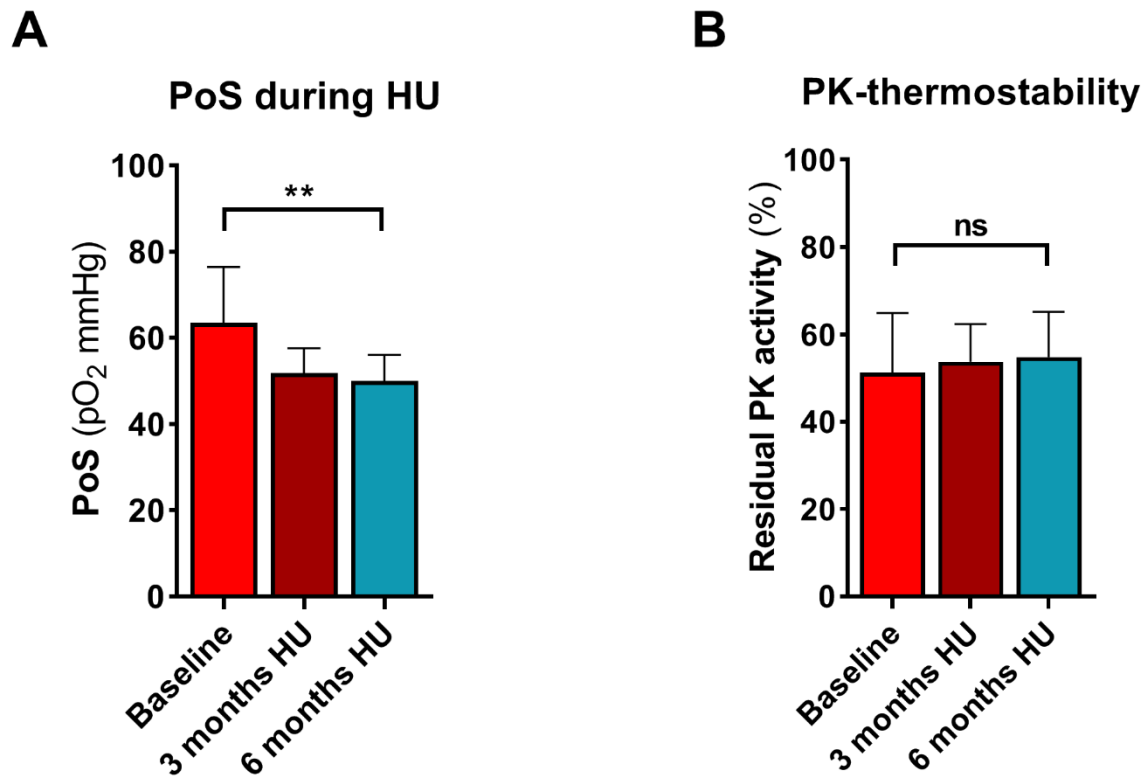

### Supplemental Figure 1. Clinical benefit of hydroxyurea (HU) therapy in SCD patients is independent of PK properties

(A) SCD patients (N=5) followed after starting HU therapy show a significant decrease in PoS after 3 (dark red bar) and 6 months (light turquoise), compared to baseline (red). (B) SCD patients (N=5) followed after starting HU therapy show no significant increase in mean PK-thermostability levels. Error bars represent standard deviation. \*\* $p < 0.01$  NS, not significant.

## Supplemental Figure 2

**A**

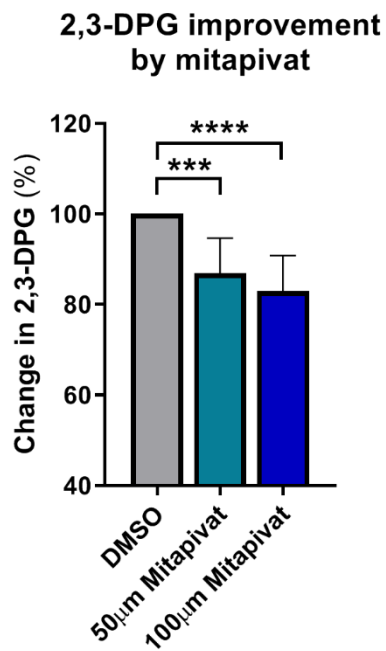

**B**

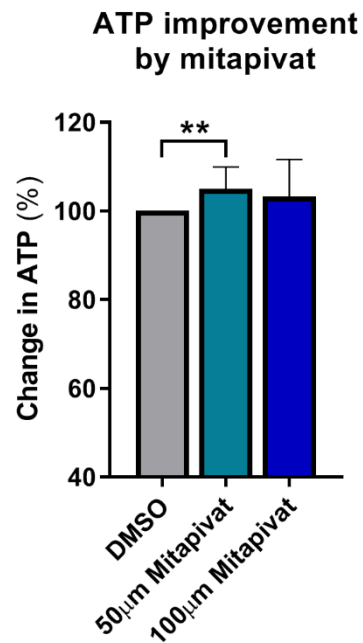

### Supplemental Figure 2. *Ex vivo* treatment with mitapivat decreases 2,3-DPG levels

2,3-diphosphoglycerate (2,3-DPG, panel A) and adenosine triphosphate (ATP) levels (panel B) after 22 hours incubation of buffy coat-depleted blood of SCD patients (N=11) in presence of 50 µM (light turquoise) and 100 µM (dark blue) mitapivat shows, respectively, a significant decrease of 17% in 2,3-DPG levels and a non-significant increase of 5% in ATP compared to vehicle controls (DMSO control, gray, N=11). Mean values are reported, error bars represent standard deviation. \*\*\*\* $p < 0.0001$ , \*\*\* $p < 0.001$ , \*\* $p < 0.01$

## Supplemental Figure 3

**A**

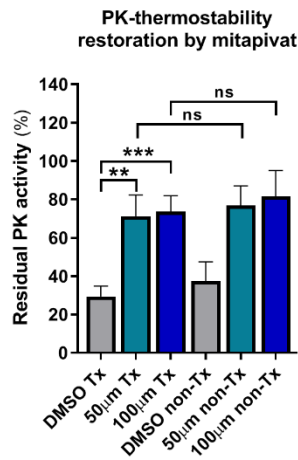

**B**

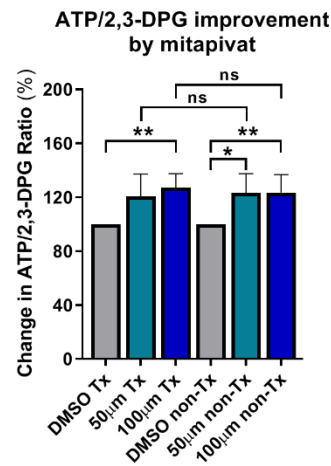

**C**

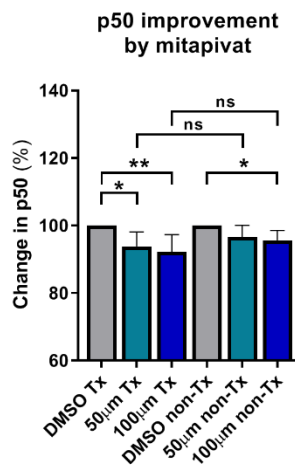

**D**

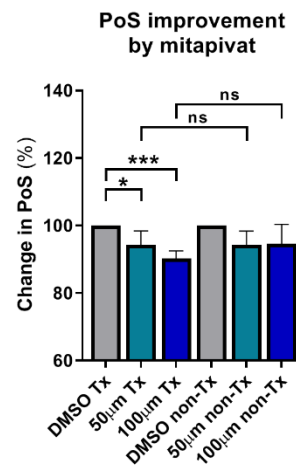

**E**

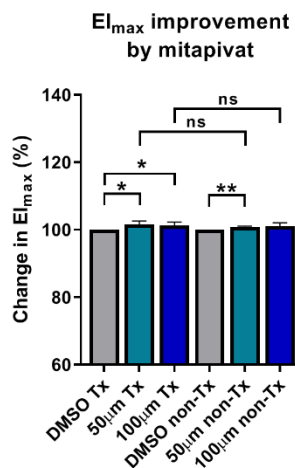

### Supplemental Figure 3. Comparable response to *ex vivo* treatment with mitapivat between non-transfused and transfused patients

PK-thermostability (panel A), ATP/2,3-DPG ratio (panel B), p50 (panel C), PoS (panel D) and El<sub>max</sub> (panel E) were measured on RBCs from SCD patients (N=11, except for PoS and El<sub>max</sub>: N=9) after 22 hours incubation of buffy coat-depleted blood in presence of 50 µM (light

turquoise) and 100  $\mu$ M (dark blue) mitapivat. The increases in PK-thermostability, ATP/2,3-DPG ratio, and  $E_{I_{max}}$ , as well as the decreases in p50 and PoS, compared to vehicle controls (DMSO control, gray, N=11), were comparable and statistically not different between non-transfused and transfused SCD patients. Mean values are reported, error bars represent standard deviation. \*\*\*\* $p < 0.0001$ , \*\*\* $p < 0.001$ , \*\* $p < 0.01$ , \* $p < 0.05$
